# Supplementary material for: Clinical Impact of Unexpected Para-Aortic Lymph Node Metastasis in Surgery for Resectable Pancreatic Cancer
Source: MDPI journal article supplement (doi:10.3390/cancers13174454), 2021-09-03
Supplement: s1 [file s1]

# Supplementary Material: Clinical Impact of Unexpected Para-Aortic Lymph Node Metastasis in Surgery for Resectable Pancreatic Cancer

Ho-Kyoung Lee, Yoo-Seok Yoon, Ho-Seong Han, Jun Suh Lee, Hee Young Na, Soomin Ahn, Jaewoo Park, Kwangrok Jung, Jae Hyup Jung, Jaihwon Kim, Jin-Hyeok Hwang and Jong-Chan Lee

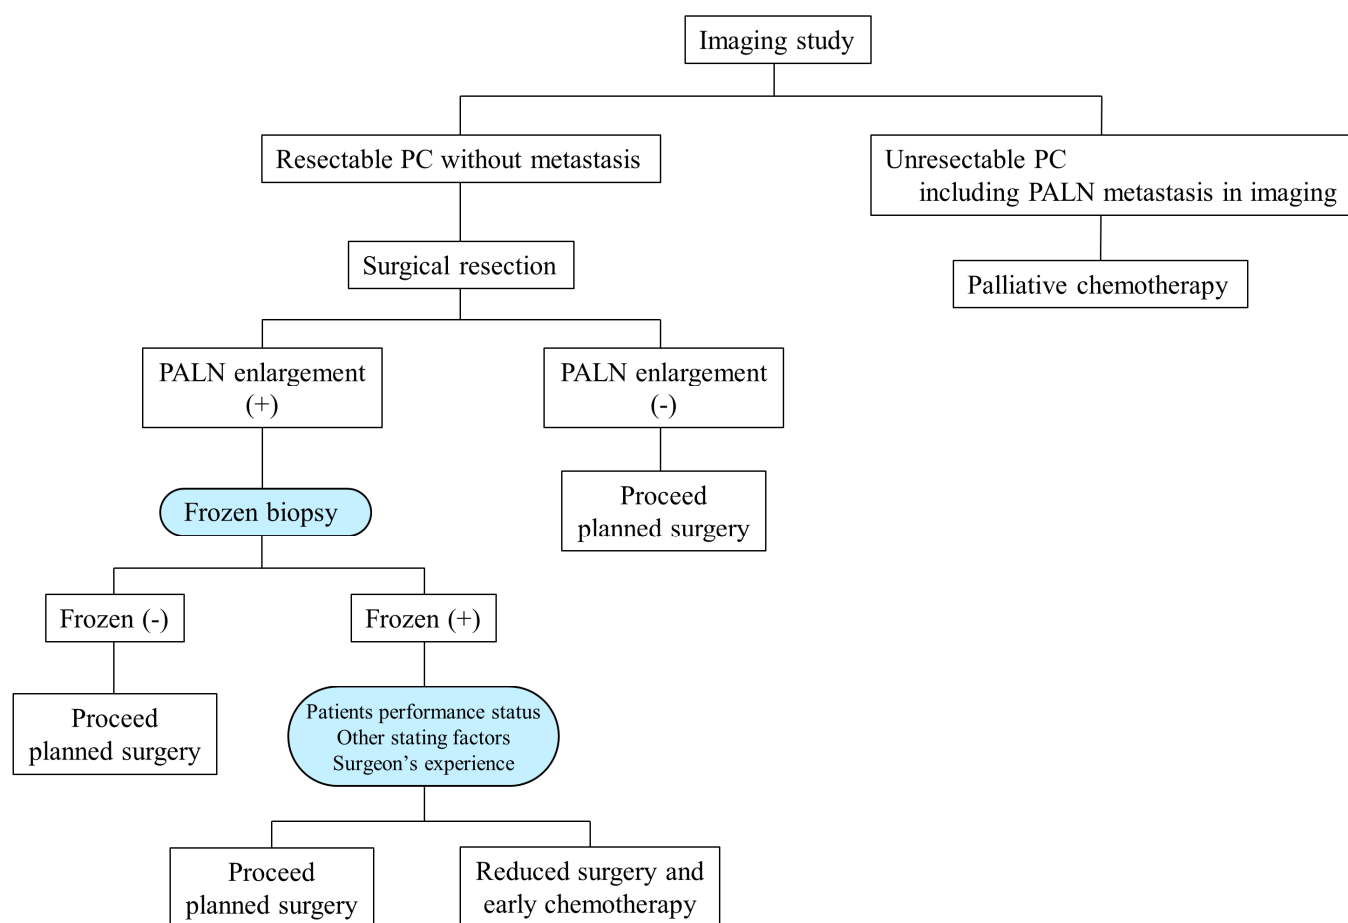

**Figure S1.** Treatment algorithm in accordance to para-aortic lymph node status. (PALN: para-aortic lymph node).
